# Supplementary material for: Synthesis of Novel Tritopic Hydrazone Ligands: Spectroscopy, Biological Activity, DFT, and Molecular Docking Studies
Source: MDPI journal article supplement (doi:10.3390/molecules27051656), 2022-03-02
Supplement: s1 [file s1]

# Synthesis of Novel Tritopic Hydrazone Ligands: Spectroscopy, Biological Activity, DFT, and Molecular Docking Studies

Sharmin Akther Rupa <sup>1</sup>, Md. Rassel Moni <sup>1</sup>, Md. Abdul Majed Patwary <sup>1,\*</sup>, Md. Mayez Mahmud <sup>2</sup>, Md. Aminul Haque <sup>3</sup>, Jamal Uddin <sup>4,\*</sup> and S. M. Tareque Abedin <sup>5,\*</sup>

<sup>1</sup> Department of Chemistry, Comilla University, Cumilla 3506, Bangladesh; sharminrupa@cou.ac.bd (S.A.R.); monirassel@gmail.com (M.R.M.)

<sup>2</sup> Faculty of Pharmaceutical Science, Tokushima University, Tokushima Shi 770-0026, Japan; hemmayez@yahoo.com (M.M.M.)

<sup>3</sup> Department of Chemistry, Jagannath University, Dhaka 1100, Bangladesh; amin2k12@chem.jnu.ac.bd (M.A.H.)

<sup>4</sup> Department of Natural Sciences, Center for Nanotechnology, Coppin State University, MD 21216, USA

<sup>5</sup> Department of Chemistry, Jahangirnagar University, Savar 1342, Bangladesh

\* Correspondence: mamajedp@gmail.com (M.A.M.P.); juddin@coppin.edu (J.U.); smtareque@juniv.edu (S.M.T.A.)

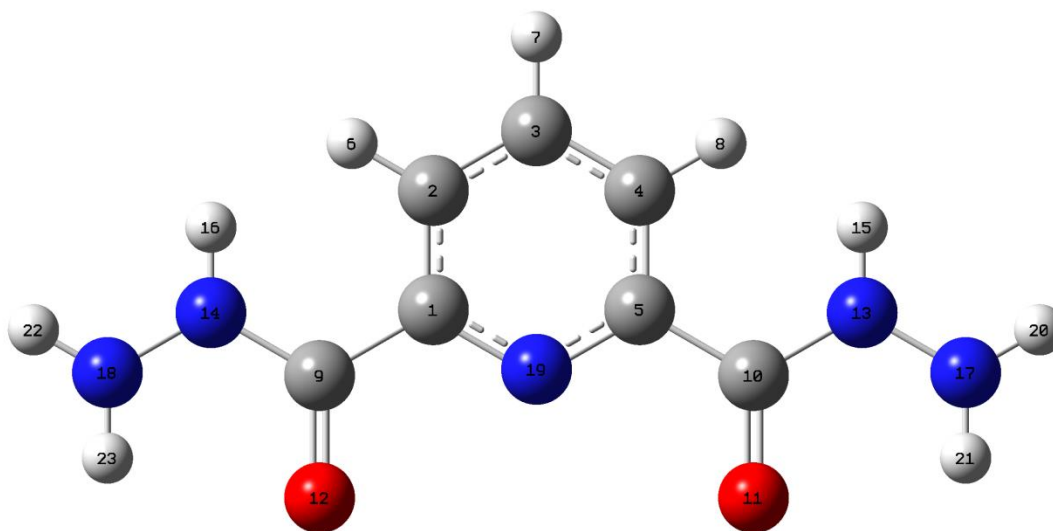

**Figure S1.** Optimized structures of the reactant 2,6-picolinic dihydrazone.

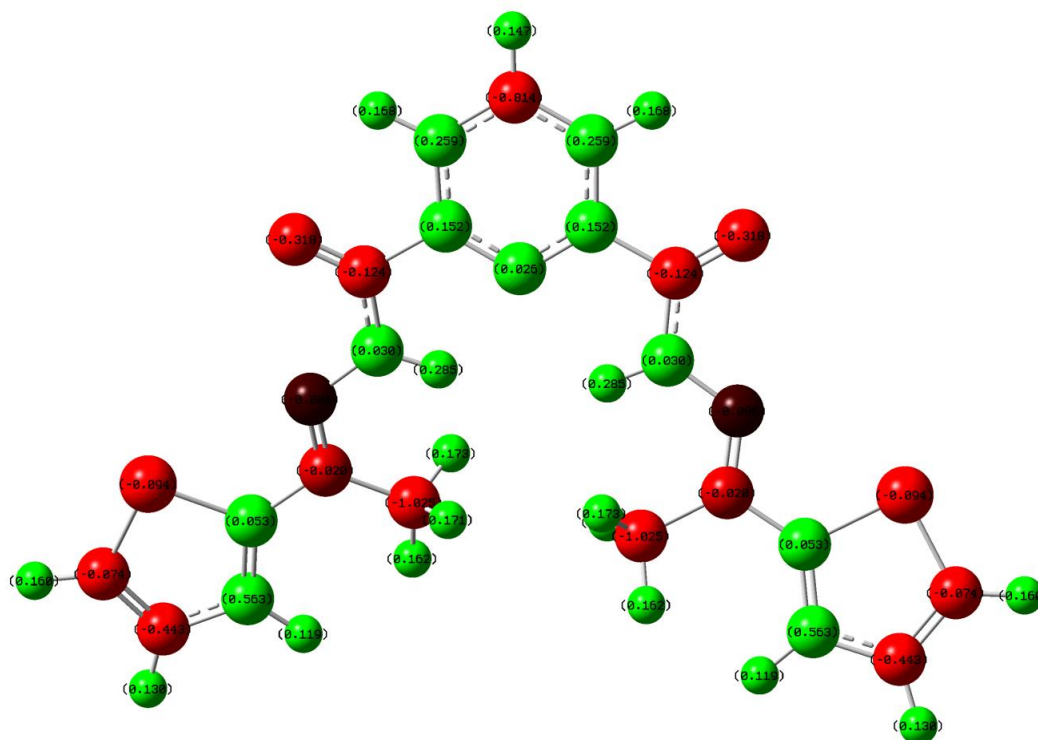

**Figure S2.** Partial atomic charge (Mulliken) on L1 where red represent negative, and green represent positive charge.

**Table S1.** Selected bond distances (Å) and bond angles (°) of reactant pyridine-2, 6-dicarboxylic dihydrazide.

| Pyridine-2,6-dicarboxylic dihydrazide |                 |                    |                |
|---------------------------------------|-----------------|--------------------|----------------|
| Atom position                         | Bond length (Å) | Atom position      | Bond angle (°) |
| C(10)-O(11)                           | 1.26            | C(1)-C(9)-N(14)    | 120.00         |
| N(13)-H(15)                           | 1.00            | O(11)-C(10)-N(13)  | 120.00         |
| N(13)-N(17)                           | 1.40            | C(10)-N(13)-N(17)  | 119.99         |
| L1                                    |                 |                    |                |
| C(10)-O(12)                           | 1.21            | C(1)-C(10)-N(14)   | 113.67         |
| N(14)-H(45)                           | 1.02            | O(12)-C(10)-N(14)  | 124.87         |
| N(14)-N(16)                           | 1.36            | C(10)-N(14)-N(16)  | 120.47         |
| N(6)- C(1)                            | 1.35            | C(10)-N(14)-H(45)  | 116.90         |
| S(43)-C(20)                           | 1.75            | H(45)- N(14)-N(16) | 122.59         |
| S(43)-C(24)                           | 1.73            | C(20)-S(43)-C(24)  | 91.40          |
| L2                                    |                 |                    |                |
| C(10)-O(12)                           | 1.22            | C(1)-C(10)-N(14)   | 113.80         |
| N(14)-H(43)                           | 1.02            | O(12)-C(10)-N(14)  | 124.78         |
| N(14)-N(16)                           | 1.36            | C(10)-N(14)-N(16)  | 120.31         |
| N(6)- C(1)                            | 1.34            | C(10)-N(14)-H(43)  | 117.14         |
| N(45)-C(20)                           | 1.38            | H(43)-N(14)-N(16)  | 122.52         |
| N(45)-C(24)                           | 1.37            | C(20)-N(45)-C(24)  | 110.18         |

**Table S2.** Theoretical and experimental  $^1\text{H}$  and  $^{13}\text{C}$  NMR chemical shifts (with respect to TMS, all values in ppm) for the title compounds.

| $^1\text{H}$ NMR    |                                 |                                   |            |                                 |                                   |
|---------------------|---------------------------------|-----------------------------------|------------|---------------------------------|-----------------------------------|
| L1                  |                                 |                                   | L2         |                                 |                                   |
| Atoms               | $\delta_{\text{exp}}$ (in DMSO) | $\delta_{\text{calc.}}$ (in DMSO) | Atoms      | $\delta_{\text{exp}}$ (in DMSO) | $\delta_{\text{calc.}}$ (in DMSO) |
| 44-H, 45-H          | 11.43                           | 10.77                             | 42-H, 43-H | 11.42                           | 10.44                             |
|                     |                                 |                                   | 46-H, 47-H | 11.34                           | 10.18                             |
| 8-H, 9-H            | 8.27-8.31                       | 8.85                              | 8-H, 9-H   | 8.32-8.34                       | 8.62                              |
| 7-H                 | 8.33-8.35                       | 8.43                              | 7-H        | 8.27-8.29                       | 8.29                              |
| 39-H, 41-H          | 7.66-7.67                       | 7.77                              | 39-H, 41-H | 6.93-6.93                       | 7.17                              |
| 38-H, 40-H          | 7.14-7.16                       | 7.30                              | 38-H, 40-H | 6.16-6.67                       | 6.49                              |
| 22-H, 27-H          | 7.61-7.62                       | 7.66                              | 22-H, 27-H |                                 | 6.89                              |
| 32-H, 36-H          | 2.52                            | 2.31                              | 32-H, 36-H | 2.39                            | 2.23                              |
| 33-H, 37-H          |                                 | 2.31                              | 33-H, 37-H |                                 | 2.32                              |
| 31-H, 35-H          |                                 | 2.79                              | 31-H, 35-H |                                 | 2.63                              |
| $^{13}\text{C}$ NMR |                                 |                                   |            |                                 |                                   |
| 10-C, 11-C          | 159.44                          | 163.51                            | 10-C, 11-C | 159.11                          | 164.23                            |
| 25-C, 20-C          | 154.55                          | 156.44                            | 25-C, 20-C | 130.04                          | 136.81                            |
| 21-C, 26-C          | 129.44                          | 133.13                            | 21-C, 26-C | 112.83                          | 117.20                            |
| 23-C, 28-C          | 128.20                          | 131.47                            | 23-C, 28-C | 109.34                          | 114.76                            |
| 24-C, 29-C          | 130.06                          | 140.65                            | 24-C, 29-C | 123.05                          | 128.26                            |
| 1-C, 5-C            | 148.91                          | 155.99                            | 1-C, 5-C   | 153.65                          | 156.54                            |
| 2-C, 4-C            | 125.75                          | 131.21                            | 2-C, 4-C   | 125.26                          | 131.57                            |
| 3-C                 | 140.48                          | 144.99                            | 3-C        | 140.31                          | 145.44                            |
| 18-C, 19-C          | 143.22                          | 154.35                            | 18-C, 19-C | 149.25                          | 155.04                            |
| 30-C, 34-C          | 15.32                           | 12.36                             | 30-C, 34-C | 14.82                           | 12.05                             |

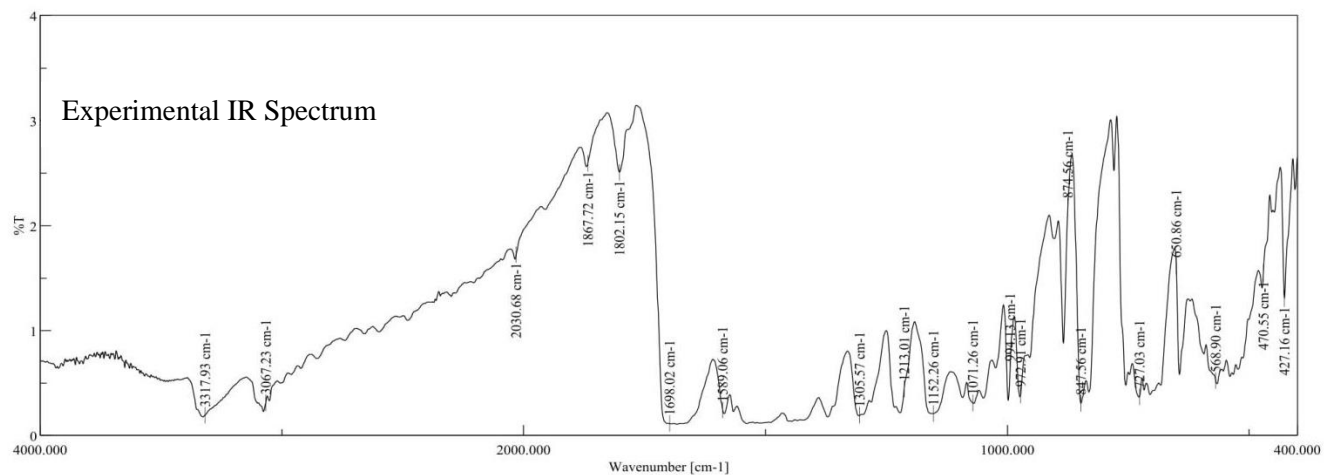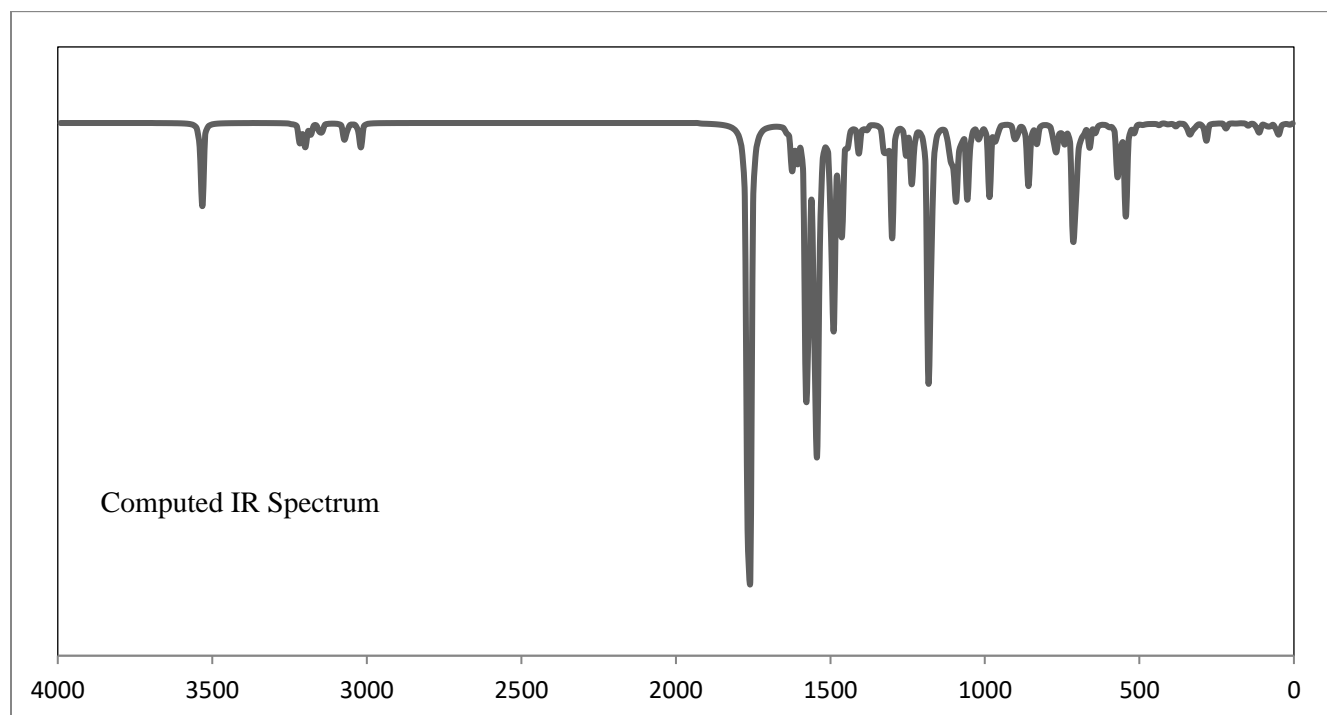

**Figure S3.** Experimental and computed Infrared Spectrum of **L1** ligand in KBr.

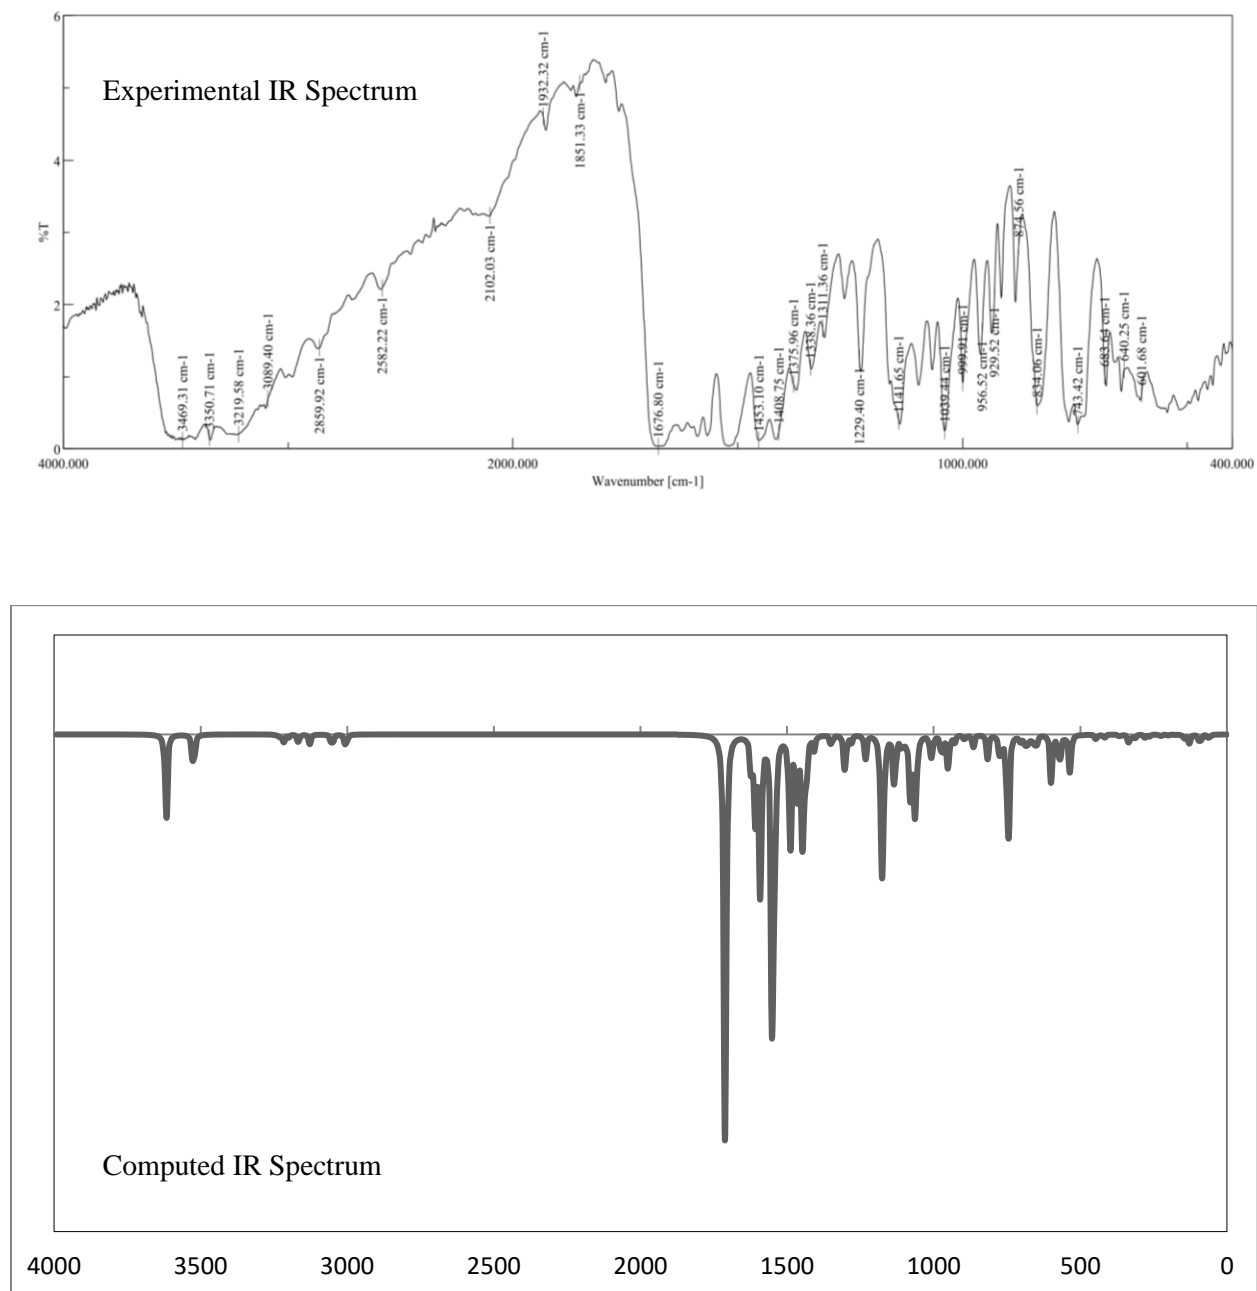

**Figure S4.** Experimental and computed Infrared Spectrum of **L2** ligand in KBr.

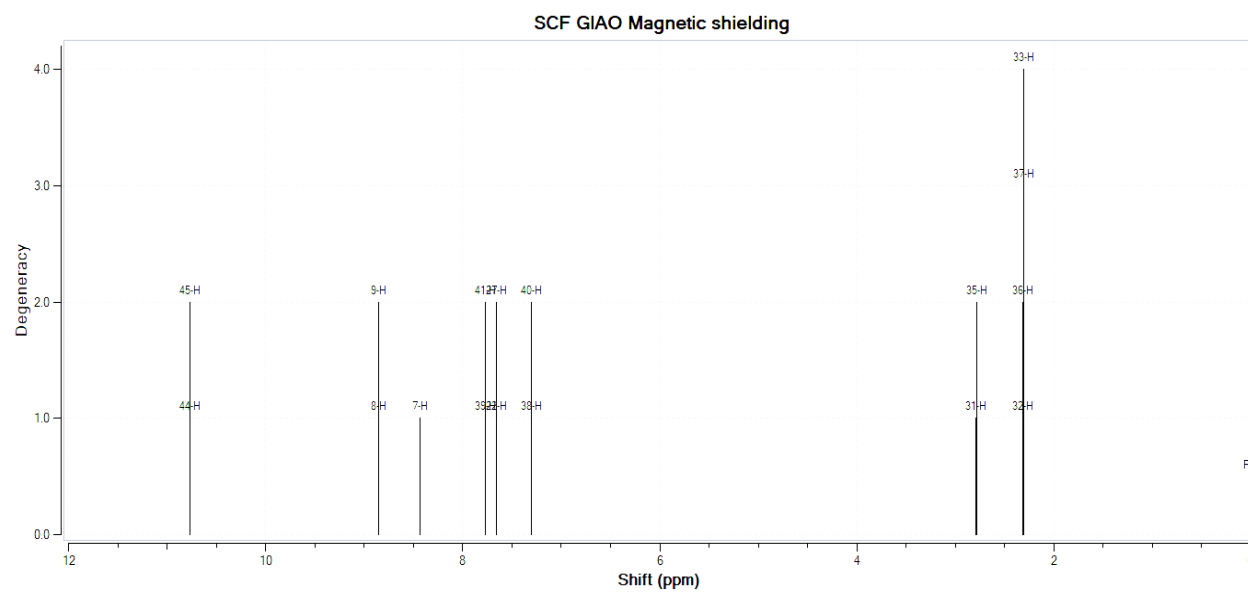

**Figure S5.** Computed  $^1\text{H}$  NMR spectrum of **L1** in DMSO.

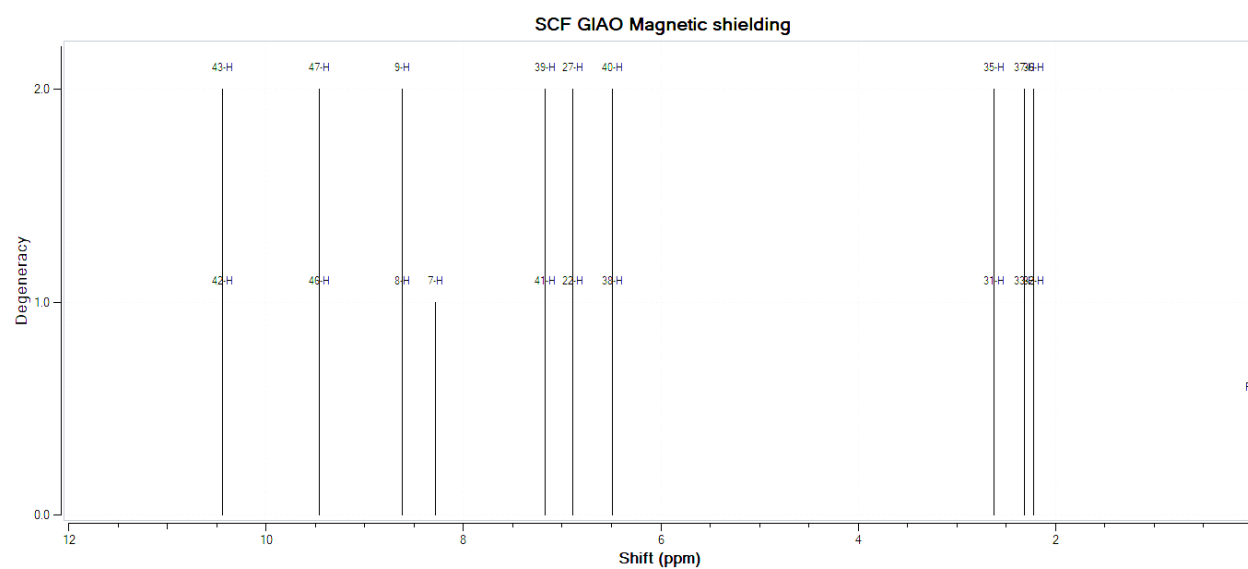

**Figure S6.** Computed  $^1\text{H}$  NMR spectrum of **L2** in DMSO.

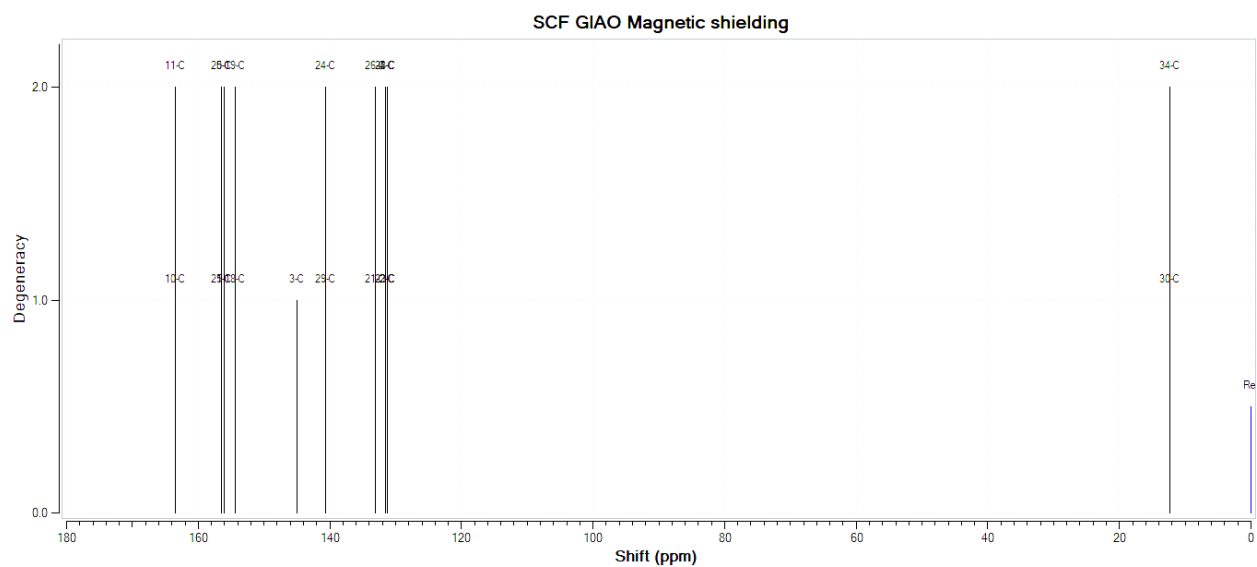

**Figure S7.** Computed  $^{13}\text{C}$  NMR spectrum of **L1**.

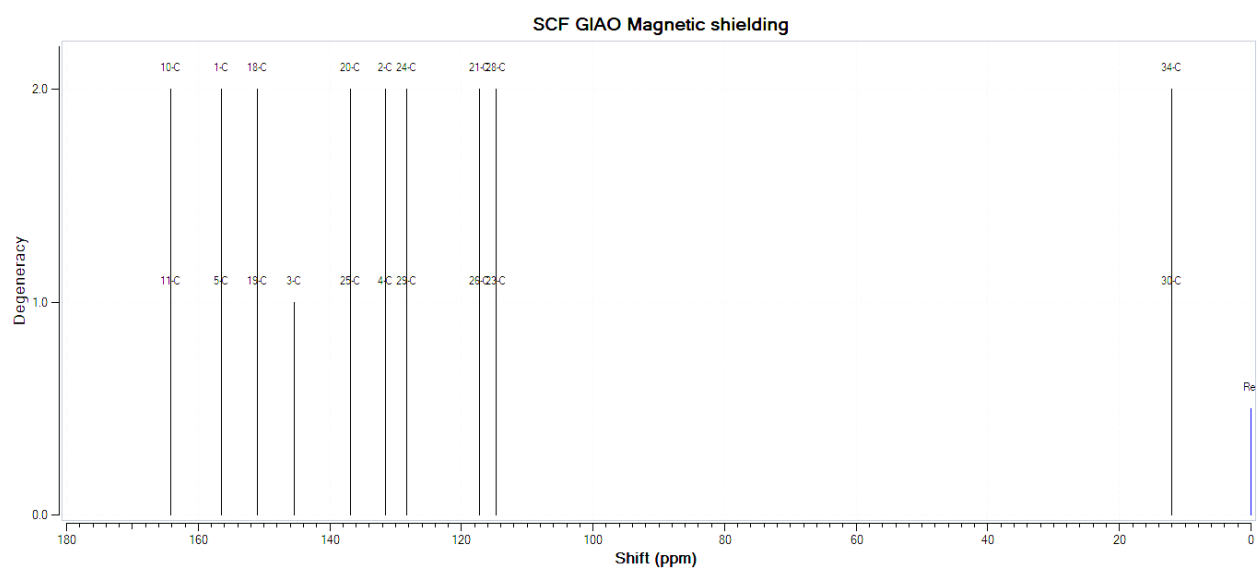

**Figure S8.** Computed  $^{13}\text{C}$  NMR spectrum of **L2**.



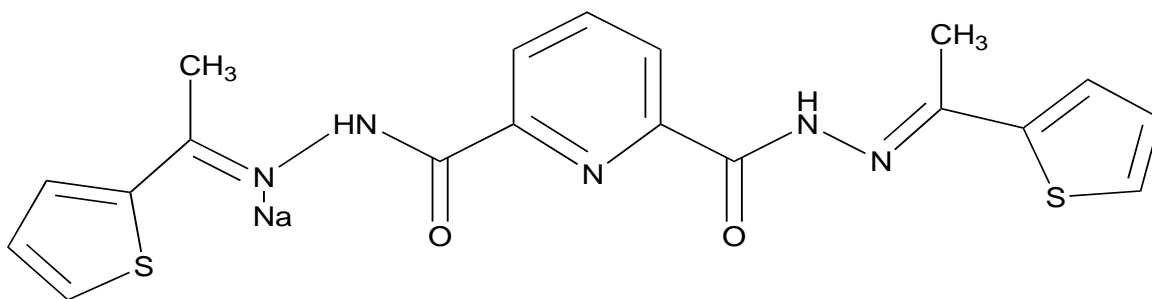

Chemical Formula:  $C_{19}H_{17}N_5NaO_2S_2$   
Exact Mass: 434.0721

Tolerance = 5000.0 mDa / DBE: min = -1.5, max = 50.0  
Selected filters: None

Monoisotopic Mass, Even Electron Ions

1 formula(e) evaluated with 1 results within limits (up to 50 closest results for each mass)

Elements Used:

C: 19-19 H: 17-17 N: 5-5 O: 2-2 Na: 0-1 S: 2-2

MAYEZ

mmm-SRL-009 7 (0.324)

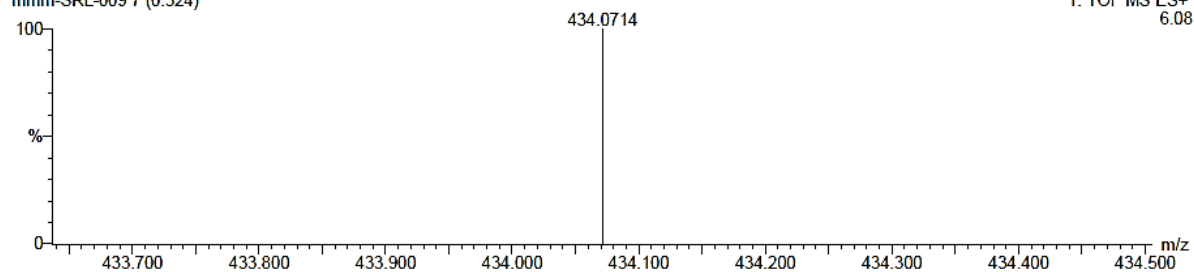

| Minimum: |            |        |      | -1.5 |       |                     |
|----------|------------|--------|------|------|-------|---------------------|
| Maximum: |            | 5000.0 | 5.0  | 50.0 |       |                     |
| Mass     | Calc. Mass | mDa    | PPM  | DBE  | i-FIT | Formula             |
| 434.0714 | 434.0721   | -0.7   | -1.6 | 13.5 | 451.2 | C19 H17 N5 O2 Na S2 |

**Figure S9.** Mass spectrum of **L1**.

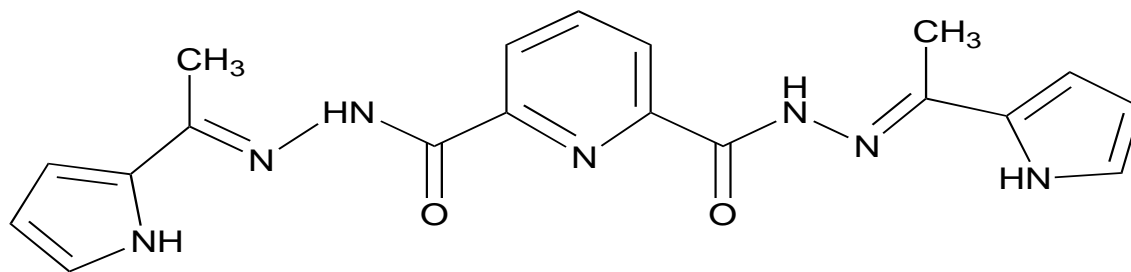

Chemical Formula:  $C_{19}H_{19}N_7O_2$

Exact Mass: 377.16

Molecular Weight: 377.41

SRL-11

Tolerance = 5000.0 mDa / DBE: min = -1.5, max = 50.0

Selected filters: None

Monoisotopic Mass, Even Electron Ions

1 formula(e) evaluated with 1 results within limits (up to 50 closest results for each mass)

Elements Used:

C: 19-19 H: 19-19 N: 7-7 O: 2-2 Na: 0-1

MAYEZ

mmm-SRL-011 14 (0.647)

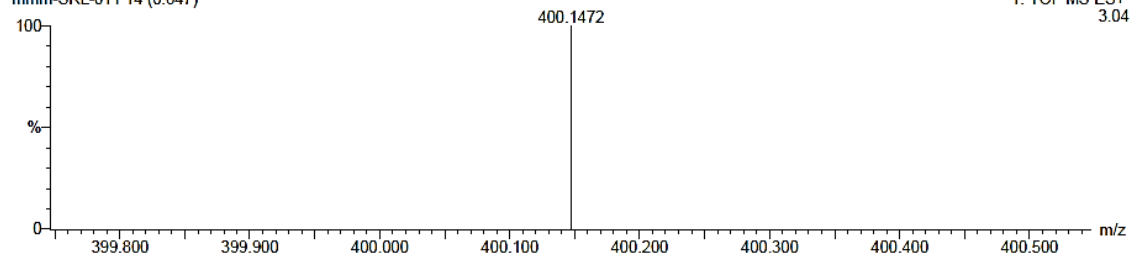

| Minimum: |            |      |      | -1.5 |       |                  |
|----------|------------|------|------|------|-------|------------------|
| Maximum: | 5000.0     | 5.0  |      | 50.0 |       |                  |
| Mass     | Calc. Mass | mDa  | PPM  | DBE  | i-FIT | Formula          |
| 400.1472 | 400.1498   | -2.6 | -6.5 | 13.5 | 267.5 | C19 H19 N7 O2 Na |

**Figure S10.** Mass spectrum of L2.

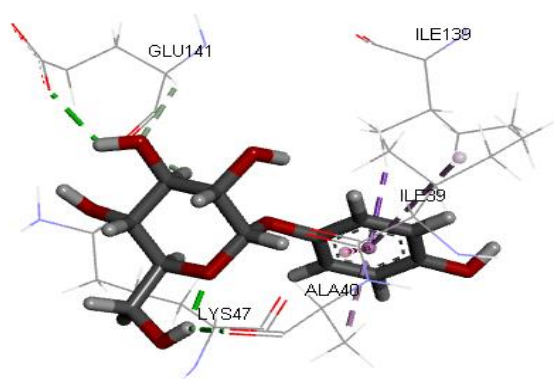

a) Arbutin-4j6u

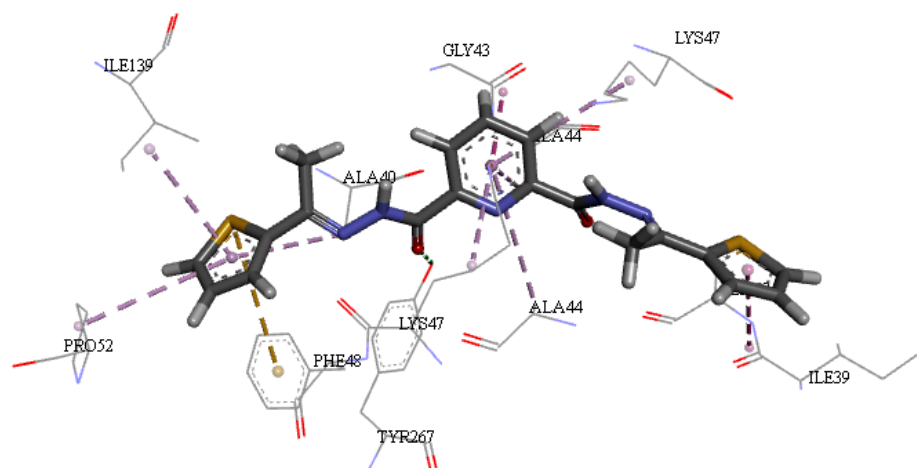

b) L1-4j6u

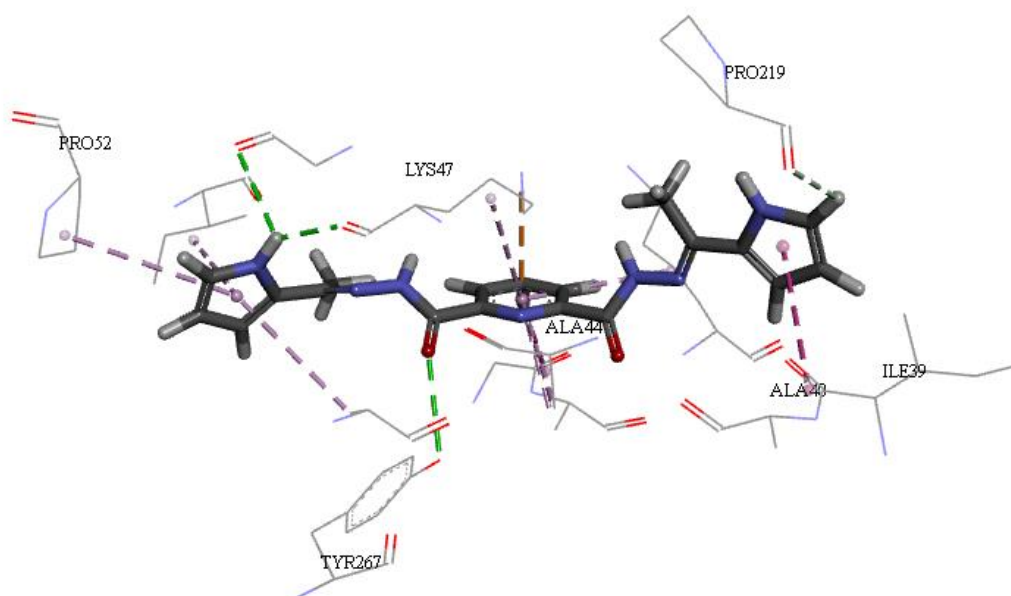

c) L2-4j6u

#### Interactions

- Attractive Charge
- Conventional Hydrogen Bond
- Carbon Hydrogen Bond

- Pi-Sigma
- Pi-Pi T-shaped
- Pi-Alkyl

**Figure S11.** 3D Non-covalent interaction maps of a) Arbutin-4j6u b) L1-4j6u and c) L2-4j6u complexes.
